# Supplementary material for: IAPV-Induced Paralytic Symptoms Associated with Tachypnea via Impaired Tracheal System Function
Source: MDPI journal article supplement (doi:10.3390/ijms221810078), 2021-09-17
Supplement: s1 [file s1]

Supplementary Information for

# IAPV-Induced Paralytic Symptoms Associated with Tachypnea via Impaired Tracheal System Function

Yanchun Deng <sup>1,2,3,†</sup>, Sa Yang <sup>1,2,†</sup>, Hongxia Zhao <sup>4</sup>, Qingyun Diao <sup>1,2</sup> and Chunsheng Hou <sup>1,2,\*</sup>

SI Figures

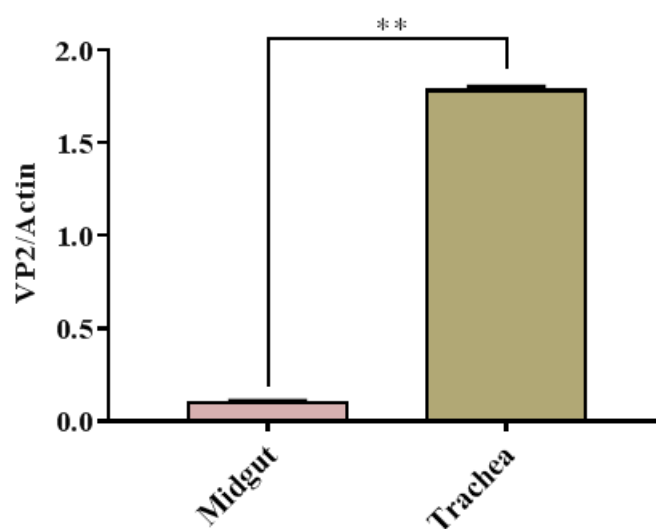

Figure S1. The relative expression level of IAPV VP2 by against actin.

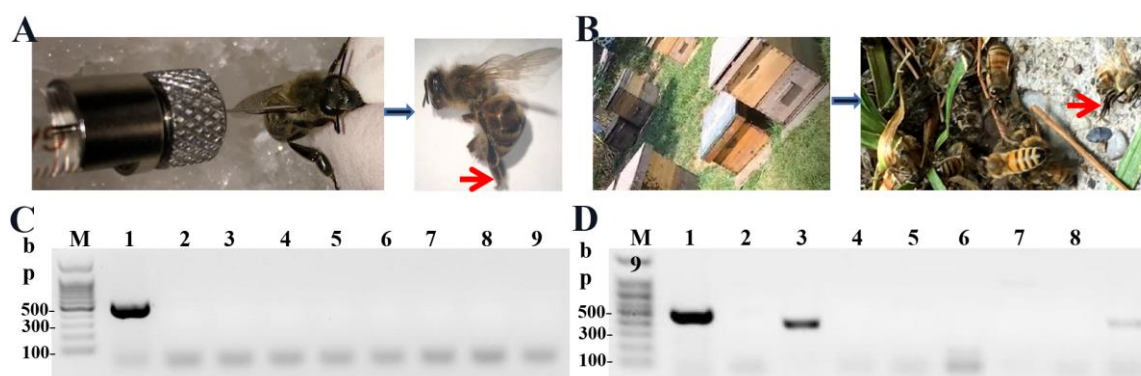

**Figure S2.** Detection of the presence of IAPV in bees infected with infectious clone and under natural conditions. (A) The way to infect bees with IAPV infectious clone and caused the typical symptom (red arrow). Bees with typical symptom were collected in field (red arrow) (B). The detection of 9 common viruses on bees after 48 hours IAPV infection (C) and bees from field-collected (D) using RT - PCR. 1: IAPV; 2: Sacbrood virus (SBV); 3: Deformed wing virus-A (DWV); 4: Varroa destructor virus (VDV); 5: Chronic bee paralysis virus (CBPV); 6: Chinese sacbrood virus (CSBV); 7: Acute bee paralysis virus (ABPV); 8: Black queen cell virus (BQCV); 9: Kakugo virus (KV).

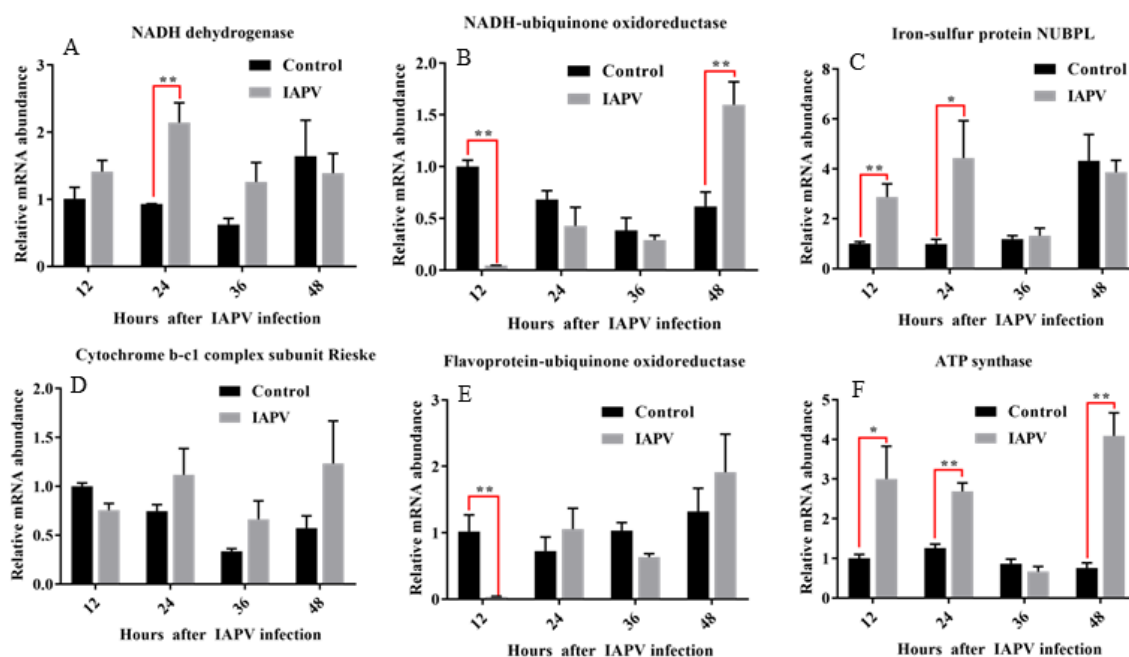

**Figure S3.** The expression level of respiratory system related genes in bees after IAPV infection. The expression levels of detected genes for *NADH dehydrogenase* (A), *NADH-ubiquinone oxidoreductase* (B), *Iron-sulfur protein NUBPL* (C), *Cytobrome b-c1 complex subunit rieske* (D), *Flavoprotein-ubiquinone oxidoreductase* (E) and *ATP synthase* (F).

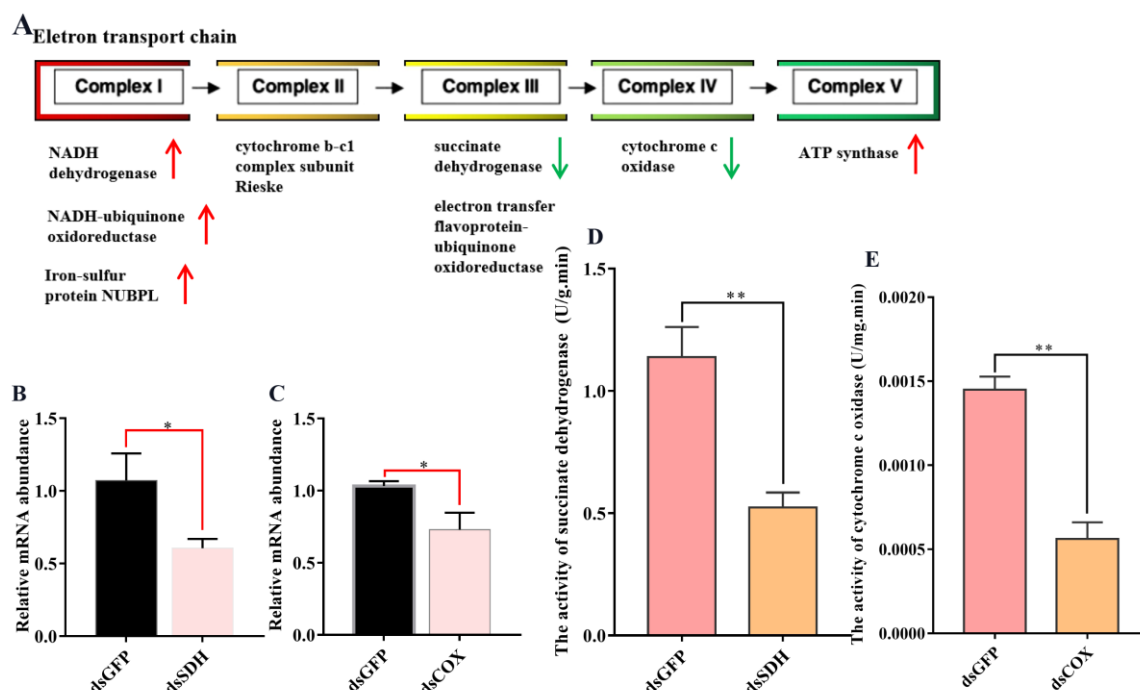

**Figure S4.** Knockdown efficiencies. (A) The schematic diagram of respiratory chain. Red indicated the up-regulated genes and blue down-regulated genes. The expression levels of *succinate dehydrogenase* (SDH) (B) and *cytochrome c oxidase* (COX) (C) gene in bees trachea after RNA interference. (D) The activity of succinate dehydrogenase (U/g.min) of trachea in bees at 36 hours after dsSDH (5 µg/bee) treatment. (E) The activity of cytochrome c oxidase (U/mg.min) of trachea in bees at 36 hours after dsCOX (5 µg/bee) treatment. Asterisks indicate significant differences of respective points (\*P < 0.05, \*\*P < 0.01).

## SI Tables

Table S1. Primers used for PCR detection common honey bee viruses.

| Virus | Primer (5'-3')                                                   | Annealing Temperature (°C) | Target Fragment (bp) |
|-------|------------------------------------------------------------------|----------------------------|----------------------|
| IAPV  | F:AGACACCAATCACGGACCTCAC<br>R:AGATTTGTCTGTCTCCCAGTGCACT          | 55                         | 475                  |
| SBV   | F:ATATACGGTGCGAGAAGTGC<br>R:CTCGGTAATAACGCCACTGT                 | 56                         | 879                  |
| ABPV  | F:TTATGTGTCTCAGAGACTGTAT<br>R:GCTCCTATTGCTCGGTTTTTC              | 55                         | 900                  |
| BQCV  | F:TGGTCAGCTCCCACTACCTTAAAC<br>R:GCAACAAGAAGAAACGTAAACCAC         | 57                         | 700                  |
| CBPV  | F:TCAGACACCGAATCTGATTATTG<br>R:ACTACTAGAACTCGTCGCTTCG            | 55                         | 570                  |
| VDV   | F:CATAGCGAATTACGGTGCAA<br>R:GAGGGGTCCCTACTCTACCG                 | 55                         | 200                  |
| DWV   | F:CTTACTCTGCCGTCGCCCCA<br>R:CCGTTAGGAACTCATTATCGCG               | 55                         | 376                  |
| CSBV  | F:CCTGGGAAGTTTGCTAGTATTACG<br>R:CCTATCACATCCATCTGGGTCAG          | 55                         | 161                  |
| KV    | F:GATATGACTGTATCCTCCATAGCATCTC<br>R:GTATGAAACATATGGCACCTCAAAAGTA | 55                         | 396                  |

Table S2. Primers used for Real-time Fluorescent Quantitative PCR.

| Gene name                                               | Primer Sequence (5'-3')                                    | GenBank Accession No. | Amplicon Size (bp) |
|---------------------------------------------------------|------------------------------------------------------------|-----------------------|--------------------|
| <i>IAPV</i>                                             | F:CCAGCCGTGAAACATGTTCTTACC<br>R:ACATAGTTGCACGCCAATACGAGAAC | KX421583.1            | 167                |
| <i>Cytochrome b-c1 complex subunit Rieske</i>           | F:GTGACCGGAAGGGGTATTGT<br>R:AACCTCCTCTGCGTTGCTAA           | XM_006557503.3        | 155                |
| <i>NADH-ubiquinone oxidoreductase electron transfer</i> | F:TCGAGAAATATTGCGATGAATCGAG<br>R:ACTGAAAGCGCACTCCTCTC      | XM_397330.6           | 213                |
| <i>flavoprotein-ubiquinone oxidoreductase</i>           | F: GTCGATTTTGTCTGCTGGTG<br>R: CCCACCTTCTGGTACAACCC         | XM_624719.6           | 155                |
| <i>NADH dehydrogenase</i>                               | F: ATCGTCCATTTTAGGTTTCGC<br>R: TCTGCCATTCTGTAATCCCGT       | NM_001172404.1        | 143                |
| <i>Cytochrome c oxidase</i>                             | F:TCGTTTCGTACTTTGTACGTCTG<br>R: TGCTCGAACAATGCCATCTT       | XM_006567340.3        | 108                |
| <i>Iron-sulfur protein NUBPL</i>                        | F: ATTTGGTCCTTCTGTGCCGT<br>R: CAACGGACCCCATGCTACTT         | XM_006571868.3        | 208                |
| <i>Succinate dehydrogenase</i>                          | F:TTGGCAGCACTGGTATTCATCA<br>R:CGTCGTTGTGGGAGGATTTC         | XM_623062.6           | 185                |
| <i>ATP synthase</i>                                     | F:CTGGCTGCTTGACATATTAAG<br>R:CATCGCTAACTGGTTTATCAGCA       | XM_003250744.4        | 110                |

**Table S3.** Primer pairs used for dsCOX, dsSUCC and dsGFP.

| Genes                          | Primer sequence1 (5'–3')                                   | Amplicon size (bp) | GenBank accession no. |
|--------------------------------|------------------------------------------------------------|--------------------|-----------------------|
| <i>Cytochrome c oxidase</i>    | F: <u>TAATACGACTCACTATAGGGAGAGGAGCG</u><br>GTTTCGGTATTTTGG | 250                | XM_006567340.3        |
|                                | R: <u>TAATACGACTCACTATAGGGAGAAAAGCA</u><br>GTTTCTCCGGGCAT  |                    |                       |
| <i>Succinate dehydrogenase</i> | F: <u>TAATACGACTCACTATAGGGAGAAGCAGG</u><br>ATTACGTGCAGCTT  | 384                | XM_623062.6           |
|                                | R: <u>TAATACGACTCACTATAGGGAGAGAGTGA</u><br>CCTGTCCTGTCTGC  |                    |                       |
| <i>GFP</i>                     | F: <u>TAATACGACTCACTATAGGGAGATTCATGG</u><br>CCAACACT TGTC  | 268                | U17997; Clontech      |
|                                | R: <u>TAATACGACTCACTATAGGGAGACAAGAA</u><br>GGACCATGTGGTC   |                    |                       |

**Video S1-S5.** The relationship between typical paralysis symptoms and respiratory failure in bee treated without (S1) and with dsRNA-SDH (S2), dsRNA-COX (S3), IAPV (S4) and antimycin A (S5).
